# Supplementary material for: Video Game Engagement: A Passkey to the Intentions of Continue Playing, Purchasing Virtual Items, and Player Recruitment (3Ps)
Source: Hindawi journal article supplement (doi:10.1155/2023/2648097), 2023-04-29
Supplement: f1 [file 2648097.f1.docx]

**Supplementary Materials**

Table S1: Indicators, Loading, and Reference

| Construct | Item | Indicator | Loading | Reference |
| --- | --- | --- | --- | --- |
| Telepresence | Tele3 | Playing the game creates a new world for me, and this world suddenly disappears when I stop playing. | 0.854 | [6] |
|  | Tele4 | After playing the game, I feel like I come back to the “real world” after a journey. | 0.886 |  |
|  | Tele5 | I strongly feel that myself is inside the virtual world when playing video game online. | 0.841 | [25] |
| Challenge | Chal1 | Playing the game challenges me. | 0.792 | [6] |
|  | Chal2 | Playing the game challenges me to perform to the best of my ability. | 0.862 |  |
|  | Chal3 | Playing the game provides a good test of my skills. | 0.801 |  |
|  | Chal4 | I find that playing the game stretches my capabilities to my limits. | 0.770 |  |
|  | Chal5 | I feel proud when I master an aspect of an electronic game. | 0.775 | [40] |
| Focused Attention | Focu2 | When I play the game, I am totally absorbed in what I am doing. | 0.770 | [6] |
|  | Focu4 | The time I spent playing the game just slipped away. | 0.780 | [33] |
|  | Focu5 | I was absorbed in my gaming task. | 0.779 |  |
|  | Focu6 | I was so involved in my gaming task that I lost track of time. | 0.605 |  |
| Role Projection | RoPr1 | Playing the online game enables me to project myself into a particular role. | 0.895 | [39] |
|  | RoPr2 | Playing the online game enables me to project myself into a particular character. | 0.924 |  |
|  | RoPr3 | Playing the online game enables me to project myself into a particular task. | 0.885 |  |
|  | RoPr4 | Playing the online game enables me to project myself into someone else. | 0.862 |  |
| Fantasy Fulfillment | Fant3 | I like to do something that I could not normally do in real life through online game. | 0.713 | [40] |
|  | Fant4 | Playing the online game helps me construct fantasies. | 0.923 | [39] |
|  | Fant5 | Playing the online game stimulates my imagination. | 0.893 |  |
|  | Fant6 | Playing the online game helps me create daydreams. | 0.898 |  |
| Escapism | Esca1 | Playing the online game helps me escape from the world of reality. | 0.767 | [39] |
|  | Esca2 | Playing the online game helps me escape from problems. | 0.822 |  |
|  | Esca3 | Playing the online game helps me escape from pressures. | 0.834 |  |
|  | Esca4 | Playing the online game helps me escape from things that are unpleasant. | 0.869 |  |
|  | Esca5 | Playing the online game helps me escape from things that are worrisome. | 0.866 |  |
|  | Esca6 | Playing the online game makes me feel as if I am in a different world of reality. | 0.781 |  |
| Arousal | Arou1 | Playing online game makes me inspired. | 0.723 | [9] |
|  | Arou2 | Playing online game makes me wide-awake. | 0.837 |  |
|  | Arou3 | Playing online game makes me motivated. | 0.826 |  |
|  | Arou4 | I find that playing electronic games raises my level of adrenaline | 0.732 | [40] |
|  | Arou7 | I play electronic games because they excite me | 0.804 |  |
| Emotional Involvement | Emot1 | When I am playing the online game, I feel ‘‘carried off’’ by the game | 0.834 | [39] |
|  | Emot2 | When I am playing the online game, I feel as if I am part of the game. | 0.777 |  |
|  | Emot3 | When I am playing the online game, I feel deeply about the game. | 0.834 |  |
|  | Emot4 | When I am playing the online game, I ‘‘get into’’ the game. | 0.800 |  |
| Enjoyment | Enjo1 | I have fun playing the online game. | 0.845 | [39] |
|  | Enjo2 | Playing the online game provides me with a lot of enjoyment. | 0.908 |  |
|  | Enjo3 | Playing the online game is enjoyable. | 0.896 |  |
|  | Enjo4 | Playing the online game makes me relax. | 0.764 | [45] |
| Social | Soci1 | Playing online game enables me to make friends. | 0.839 | [52] |
| Interaction | Soci2 | I enjoy meeting the friends I make while playing online game. | 0.876 |  |
|  | Soci3 | Communicating with others makes online game more enjoyable. | 0.871 |  |
|  | Soci4 | Communicating with others is useful for playing online game | 0.882 |  |
|  | Soci5 | Cooperating with others makes online game more enjoyable | 0.830 | [51] |
| Gamer | GaEx2 | I am absorbed in online games. | 0.922 | [3] |
| Experience | GaEx4 | Playing online games entertains me. | 0.909 |  |
|  | GaEx5 | The screen of the mobile game is attractive | 0.853 | [10] |
| Video | VGen1 | Playing online games repeatedly was worthwhile. | 0.720 | [4] |
| Game | VGen3 | Playing online game make me more interested in this game. | 0.800 |  |
| Engagement | VGen4 | I spend a lot of time playing this online game, compared to other game. | 0.769 | Modified from [59] |
|  | VGen5 | Whenever I'm playing game, I usually use this online game. | 0.782 |  |
|  | VGen6 | This online game is one of the brands I usually play when I play game. | 0.801 |  |
| Intention | IntPl1 | I intend to continue playing online game rather than discontinuance. | 0.854 | [3] |
| to Continue | IntPl2 | I intend to continue playing the online game rather than other games. | 0.889 |  |
| Playing | IntPl3 | I will play this online game frequently in the future. | 0.894 | [62] |
| Game | IntPl4 | I will play this online game for a long time. | 0.893 |  |
| Intention to | InPur1 | In the future, I will purchase virtual items again. | 0.886 | [62] |
| Purchase | InPur2 | In the future, I will recommend virtual items to my friends. | 0.760 |  |
| Game Item | InPur4 | In the future, I will continue to purchase virtual items. | 0.899 |  |
|  | InPur5 | The likelihood that I would purchase virtual items is high. | 0.868 | [28] |
|  | InPur6 | I probably to buy virtual items in the future | 0.883 |  |
|  | InPur7 | I intend to purchase virtual items for my characters in online game | 0.888 |  |
| Intention | InRec1 | I try to get my friends to play online game. | 0.902 | [28] |
| to Recruit | InRec3 | I have invited friends to play online game. | 0.903 |  |
| New Player | InRec4 | I try to get people to play online game for the first time. | 0.856 |  |
|  | InRec5 | I tell people to try play online game. | 0.918 |  |

Table S2. MAE *PLS and MAE LM*

|  | **MAE PLS** | **Greater or Less** | **MAE LM** |
| --- | --- | --- | --- |
| GaEx2 | 0,453 | < | 0,486 |
| GaEx4 | 0,434 | < | 0,472 |
| GaEx5 | 0,531 | < | 0,565 |
| InPl3 | 1,088 | < | 1,113 |
| InPl1 | 1,044 | < | 1,096 |
| InPl2 | 1,027 | < | 1,063 |
| InPl4 | 1,002 | > | 0,994 |
| InPur5 | 1,403 | < | 1,535 |
| InPur6 | 1,324 | < | 1,362 |
| InPur4 | 1,313 | < | 1,433 |
| InPur7 | 1,380 | < | 1,461 |
| InPur1 | 1,362 | < | 1,428 |
| InPur2 | 1,397 | < | 1,466 |
| InRec5 | 1,292 | < | 1,317 |
| InRec4 | 1,447 | < | 1,529 |
| InRec3 | 1,216 | < | 1,316 |
| InRec1 | 1,288 | > | 1,279 |
| VGEn3 | 0,716 | < | 0,738 |
| VGEn6 | 0,761 | < | 0,777 |
| VGEn1 | 0,728 | < | 0,795 |
| VGEn4 | 0,814 | < | 0,850 |
| VGEn5 | 0,827 | < | 0,892 |
